# Supplementary material for: Association of iminium and alkanolamine forms of the benzo[c]phenanthridine alkaloid chelerythrine with human serum albumin: photophysical, thermodynamic and theoretical approach
Source: Royal Society of Chemistry journal article supplement (doi:10.1039/c7nj02972a), 2017-12-27
Supplement: c7nj02972a1.pdf [file c7nj02972a1.pdf]

## **ELECTRONIC SUPPLEMENTARY INFORMATION (ESI)**

### **Association of iminium and alkanolamine forms of the benzo[c]phenanthridine alkaloid chelerythrine with human serum albumin: Photophysical, thermodynamic and theoretical approach**

Sutanwi Bhuiya,\* Lucy Haque and Suman Das\*

Department of Chemistry

Jadavpur University

Raja S. C. Mullick Road, Jadavpur

Kolkata 700 032

India

\*Corresponding authors

Tel.: +91 94 3437 3164, +91033 2457 2349

Fax: +91 33 2414 6266

E-mail: SD: [sumandas10@yahoo.com](mailto:sumandas10@yahoo.com)

SB: [s.bhuiya12@gmail.com](mailto:s.bhuiya12@gmail.com)

LH: [lucy.haque@gmail.com](mailto:lucy.haque@gmail.com)

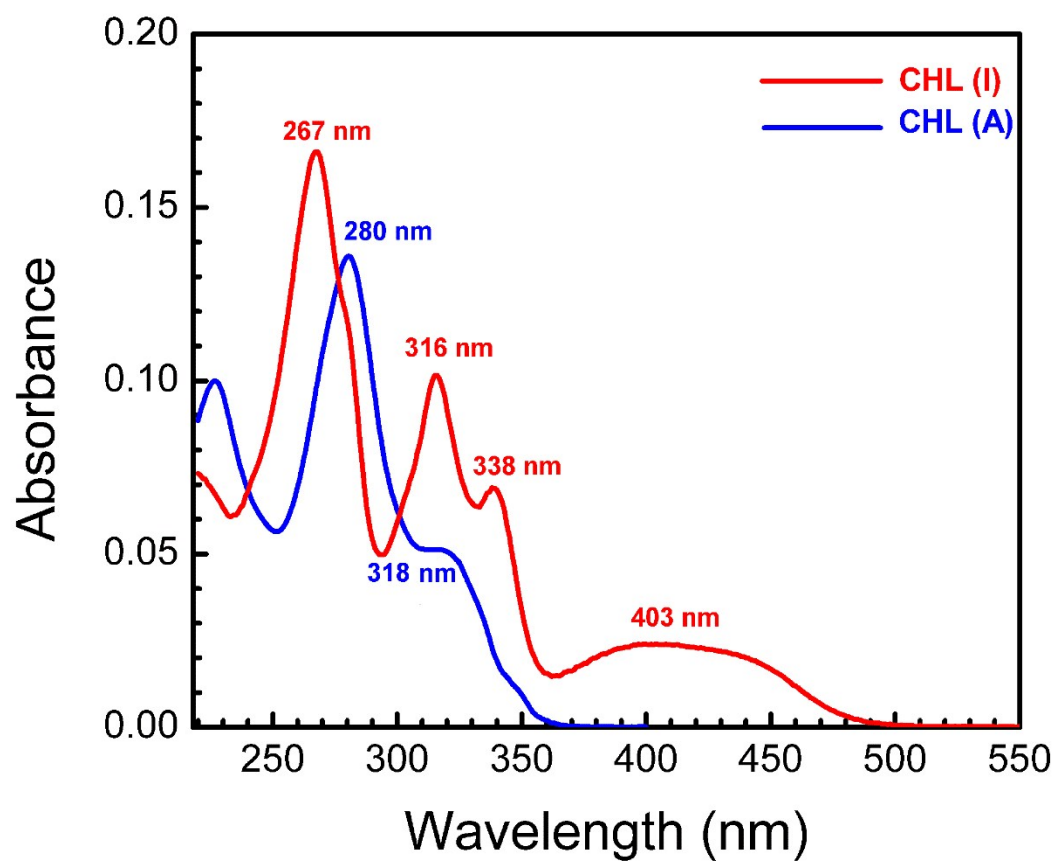

**Fig. S1**

**Fig. S1** Absorption spectra of iminium and alkanolamine forms of CHL (2.74  $\mu\text{M}$ ) in CP buffer (pH 6.0) and CB buffer (pH 10.2) respectively at 25  $^{\circ}\text{C}$ .

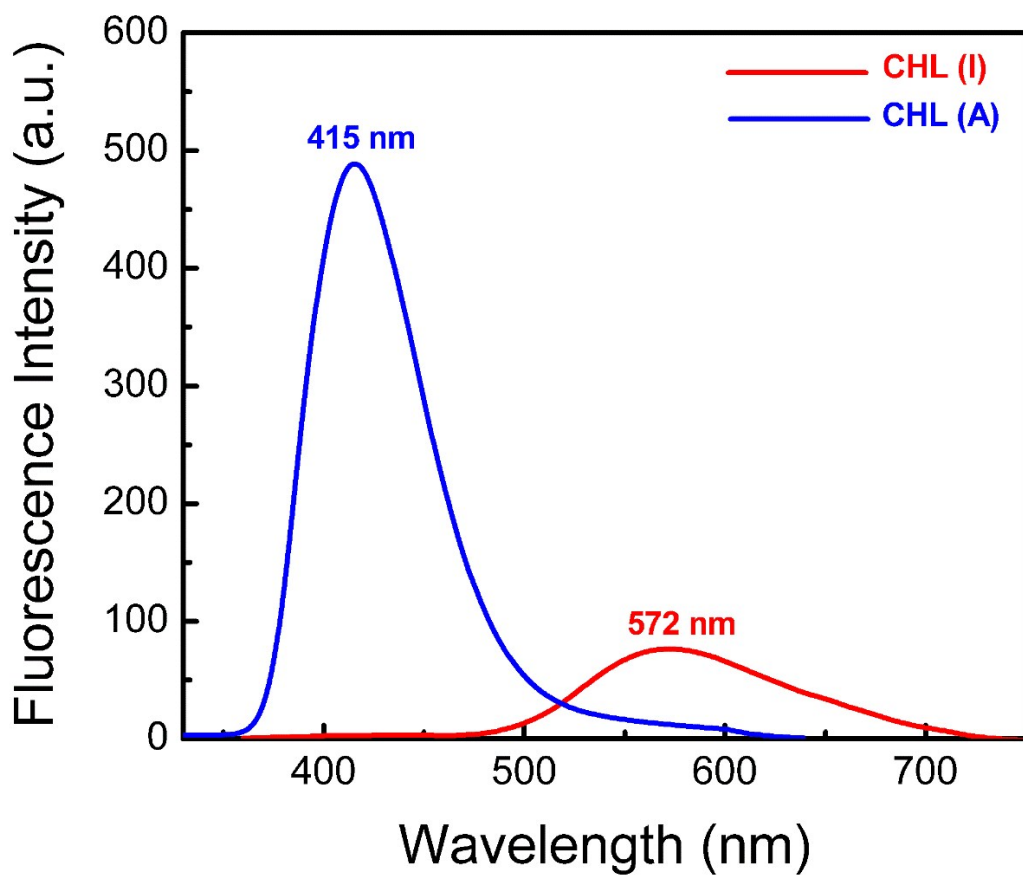

**Fig. S2**

**Fig. S2** Fluorescence emission spectra of iminium and alkanolamine forms of CHL (1.37  $\mu\text{M}$ ) in CP buffer (pH 6.0) and CB buffer (pH 10.2) respectively at 25  $^{\circ}\text{C}$ .

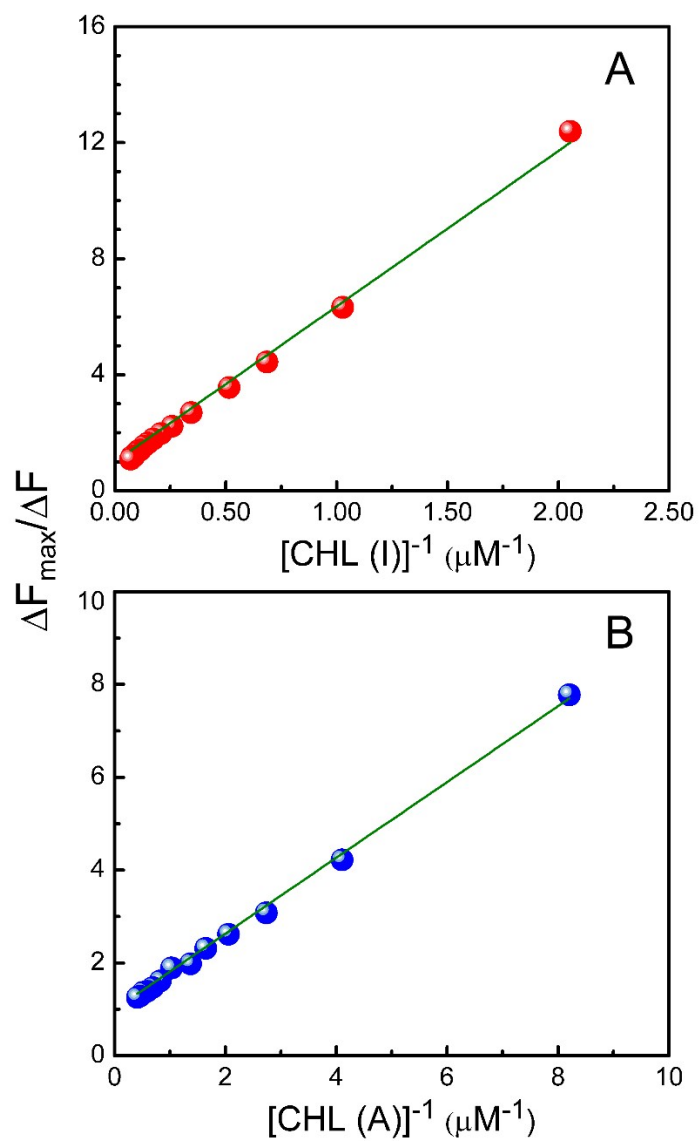

**Fig. S3**

**Fig. S3** Representative Benesi-Hildebrand plot for the complexation of HSA with (A) CHL (I) and (B) CHL (A). The solid line is the linear best fit of the experimental points.

Table S1 Life time data for CHL in absence and in presence of HSA in respective buffers at 25

°C<sup>a</sup>

| Drug    | [HSA]/[CHL] | $\tau_1$ (ns) | $\alpha_1 \times 100$ | $\tau_2$ (ns) | $\alpha_2 \times 100$ | $\tau_{\text{avg}}$ (ns) | $\chi^2$ |
|---------|-------------|---------------|-----------------------|---------------|-----------------------|--------------------------|----------|
| CHL (I) | 0.00        | 0.49          | 100                   | -             | -                     | 0.49                     | 1.03     |
|         | 0.49        | 0.46          | 95.56                 | 2.80          | 4.44                  | 0.56                     | 1.03     |
|         | 0.98        | 0.46          | 94.29                 | 2.92          | 5.71                  | 0.60                     | 1.05     |
|         | 1.97        | 0.46          | 92.29                 | 3.79          | 7.71                  | 0.72                     | 1.09     |
|         | 2.95        | 0.46          | 91.54                 | 3.80          | 8.46                  | 0.74                     | 1.01     |
| CHL (A) | 0.00        | 3.19          | 100                   | -             | -                     | 3.19                     | 1.04     |
|         | 0.49        | 3.16          | 46.68                 | 4.38          | 53.32                 | 3.81                     | 1.09     |
|         | 0.98        | 3.15          | 43.85                 | 4.54          | 56.15                 | 3.93                     | 1.09     |
|         | 1.48        | 3.13          | 32.99                 | 4.78          | 67.01                 | 4.24                     | 1.11     |
|         | 2.46        | 3.11          | 30.49                 | 4.86          | 69.51                 | 4.33                     | 1.10     |
|         | 3.44        | 3.08          | 29.59                 | 4.91          | 70.41                 | 4.37                     | 1.11     |

<sup>a</sup>Average of three determinations.

Table S2 Lifetime data for HSA in absence and in presence of CHL (I) and CHL (A) in respective buffers at 25 °C<sup>a</sup>

| Drug    | [CHL]/[HSA] | $\tau_1$ (ns) | $\alpha_1 \times 100$ | $\tau_2$ (ns) | $\alpha_2 \times 100$ | $\tau_{\text{avg}}$ (ns) | $\chi^2$ |
|---------|-------------|---------------|-----------------------|---------------|-----------------------|--------------------------|----------|
| CHL (I) | 0.00        | 2.17          | 18.84                 | 6.76          | 81.16                 | 5.89                     | 1.02     |
|         | 2.06        | 2.14          | 13.27                 | 6.30          | 86.73                 | 5.75                     | 1.05     |
|         | 4.11        | 2.13          | 11.80                 | 5.99          | 88.20                 | 5.53                     | 1.04     |
|         | 6.83        | 2.08          | 6.59                  | 5.74          | 93.41                 | 5.50                     | 1.10     |
| CHL (A) | 0.00        | 2.20          | 21.66                 | 6.40          | 78.14                 | 5.48                     | 0.97     |
|         | 0.69        | 2.16          | 22.35                 | 6.27          | 77.65                 | 5.35                     | 1.02     |
|         | 1.38        | 2.10          | 23.57                 | 6.12          | 76.43                 | 5.17                     | 1.07     |
|         | 2.06        | 2.12          | 23.99                 | 5.89          | 76.01                 | 4.99                     | 1.09     |

<sup>a</sup>Average of three determinations.

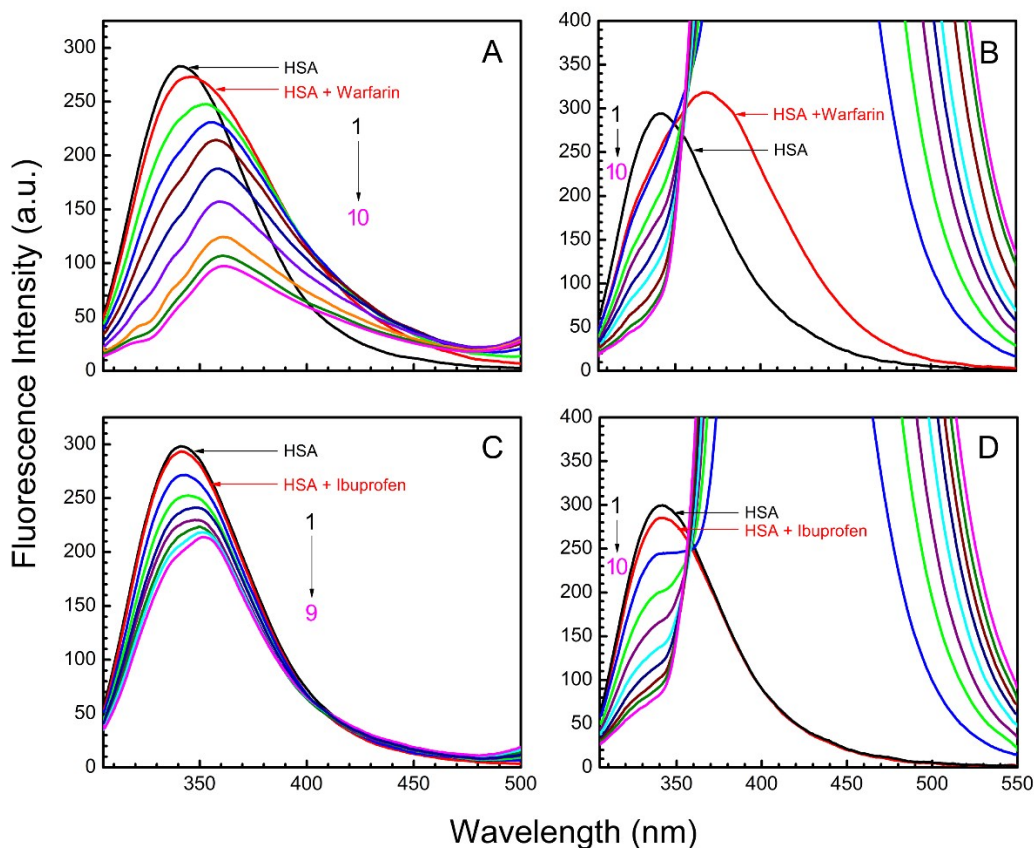

**Fig. S4**

**Fig. S4** Effect of site marker on the CHL-HSA system: [warfarin] = [HSA] = 1  $\mu\text{M}$  with CHL (I) (panel A) and CHL (A) (panel B) respectively. [ibuprofen] = [HSA] = 1  $\mu\text{M}$  with CHL (I) (panel C) and CHL (A) (panel D) respectively. In panel (A) curves 1-10 denote 0, 0, 0.74, 1.48, 2.97, 4.44, 5.92, 7.39, 8.88 and 10.33  $\mu\text{M}$  of CHL (I) and in panel (B) curves 1-10 denote 0, 0, 0.37, 0.74, 1.11, 1.86, 2.23, 2.96, 3.71 and 4.44  $\mu\text{M}$  of CHL (A). In panel (C) curves 1-9 denote 0, 0, 0.74, 1.48, 2.97, 4.44, 5.92, 7.39 and 8.88  $\mu\text{M}$  of CHL (I) and in panel (D) curves 1-10 denote 0, 0, 0.37, 0.74, 1.11, 1.86, 2.23, 2.96, 3.71 and 4.44  $\mu\text{M}$  of CHL (A).

Table S3 Binding environment of CHL (I) and CHL (A) at subdomain IIA of HSA

| Ligand binding | Neighbouring residues at the binding site |                                                            |                                                            |
|----------------|-------------------------------------------|------------------------------------------------------------|------------------------------------------------------------|
|                | Charged polar (basic)                     | Uncharged polar                                            | Hydrophobic                                                |
| CHL (I)        | Lys 199, His 242,<br>Arg 257              | Tyr 148, Tyr 150,<br>Gln 196, Cys 200,<br>Cys 245, Cys 246 | Trp 214, Ala 291                                           |
| CHL (A)        | Arg 218, Arg 222,<br>His 242, Arg 257     | -                                                          | Trp 214, Leu 219,<br>Leu 238, Leu 260,<br>Ile 264, Ala 291 |
